# Supplementary material for: Compound 49b Regulates ZO-1 and Occludin Levels in Human Retinal Endothelial Cells and in Mouse Retinal Vasculature
Source: PubMed Central journal article supplement (PMC5256679; doi:10.1167/iovs.16-20412), 2017-01
Supplement: iovs-57-15-30_s01.pdf [file iovs-57-15-30_s01.pdf]

Supplemental Figure 1

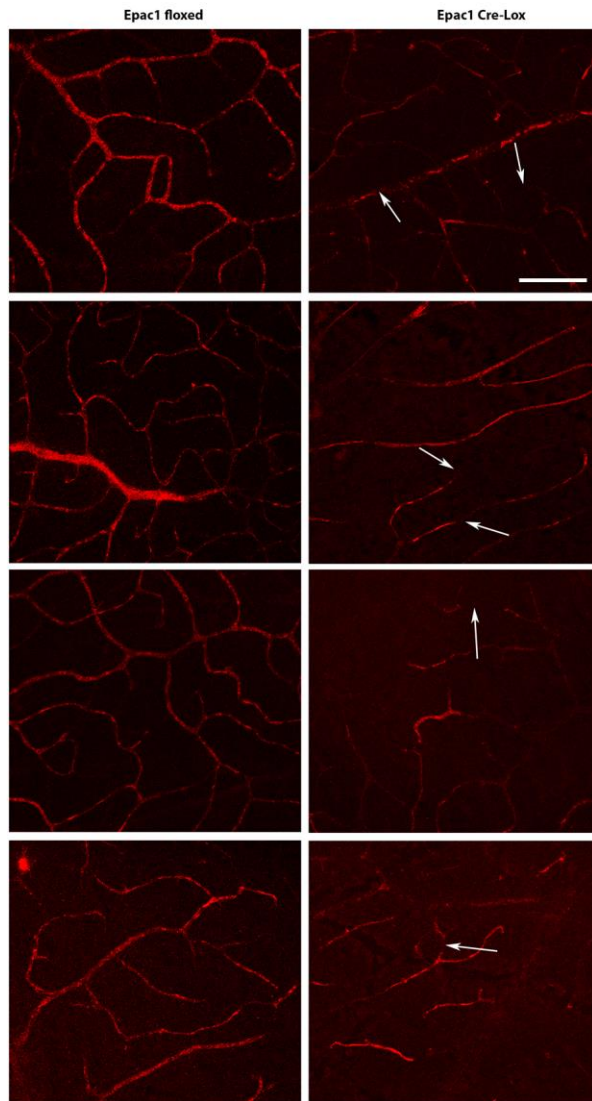

Supplemental Figure 1. Representative ZO-1 immunostaining from all 4 Epac1 floxed and Epac1 Cre-Lox mice. Scale bar is 50um. Arrows show locations of gaps in staining.

**Supplemental Figure 2**

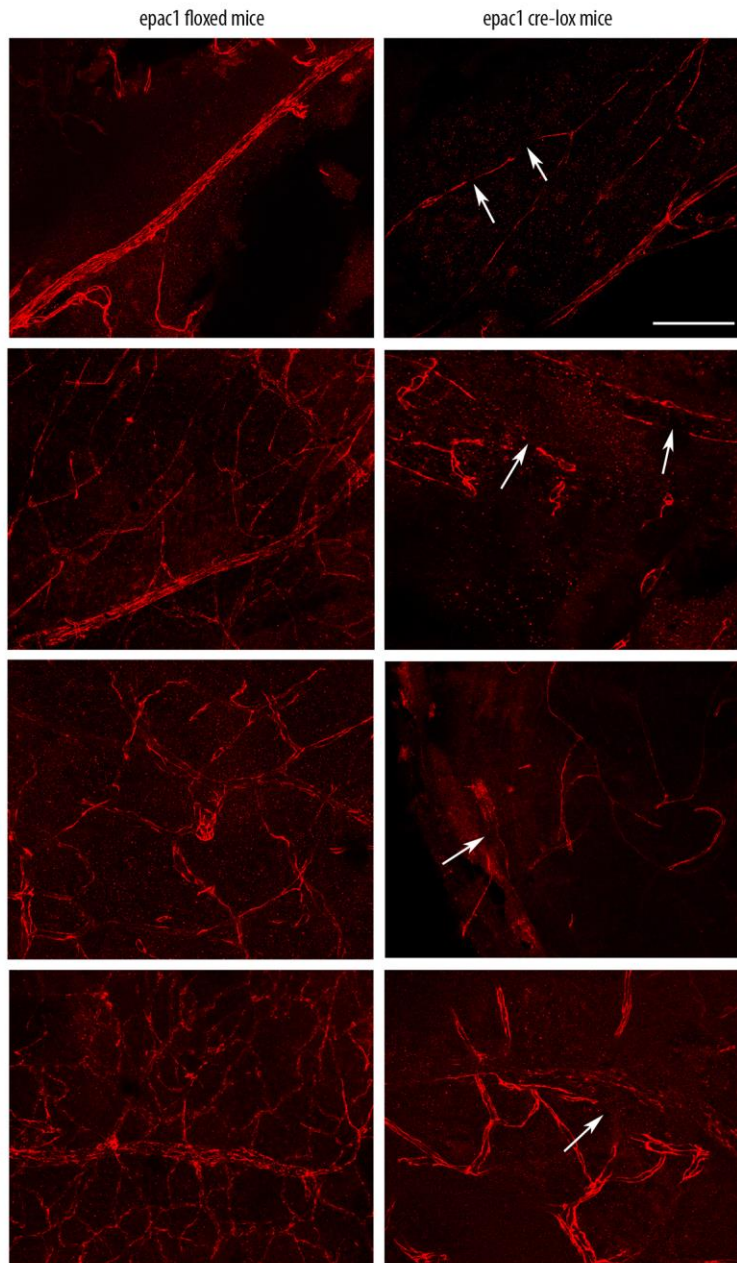

Supplementary Figure 2. Representative occludin immunostaining from all 4 Epac1 floxed and Epac1 Cre-Lox mice. Scale bar is 50um. Arrows show locations of gaps in staining.
